# Supplementary material
Source: PubMed Central journal article supplement (PMC3783949)

1 2

P8,P7,P6,P5,P4,P3,P2,P1

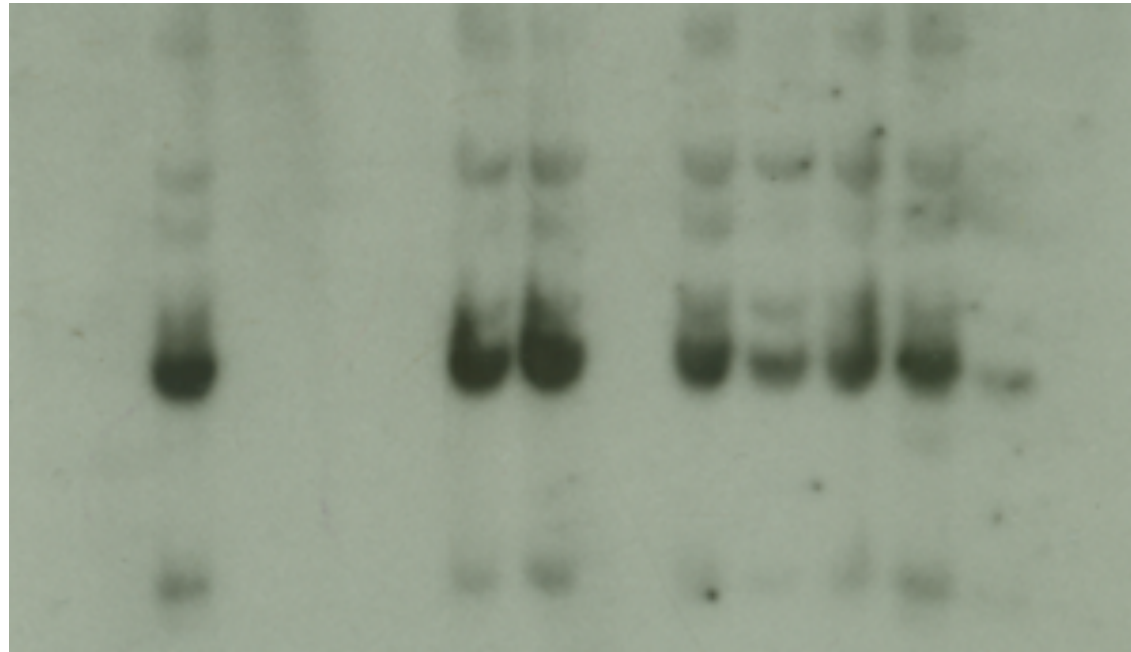

Suppl. Figure 1

**A**

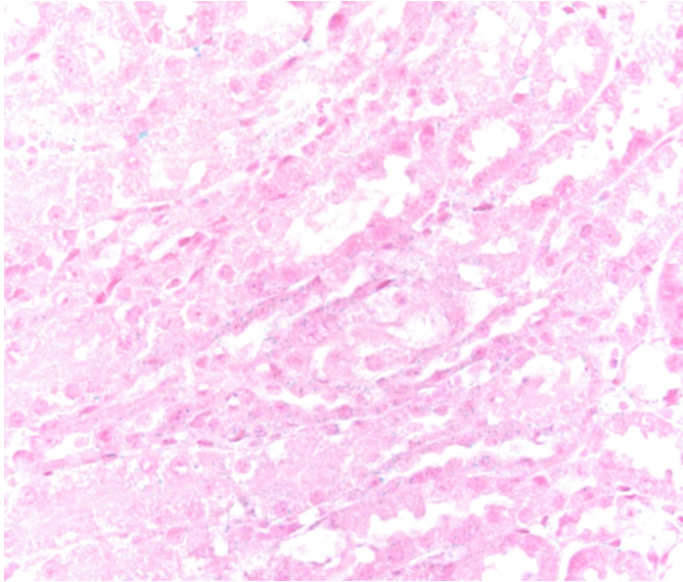

**B**

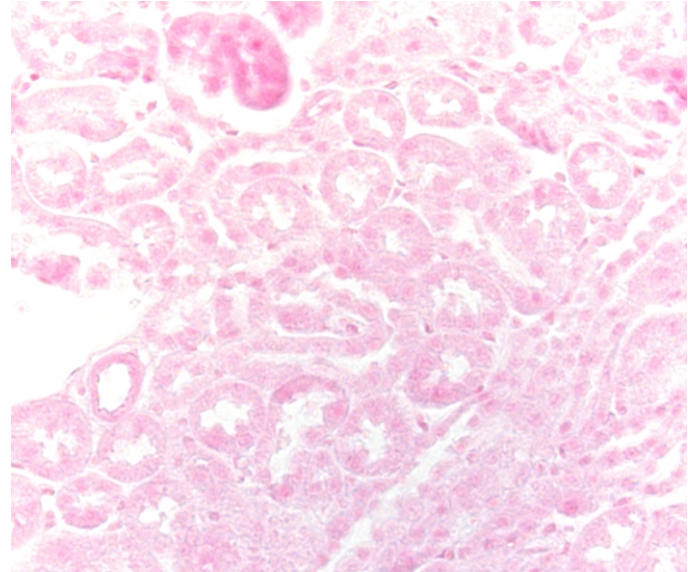

**C**

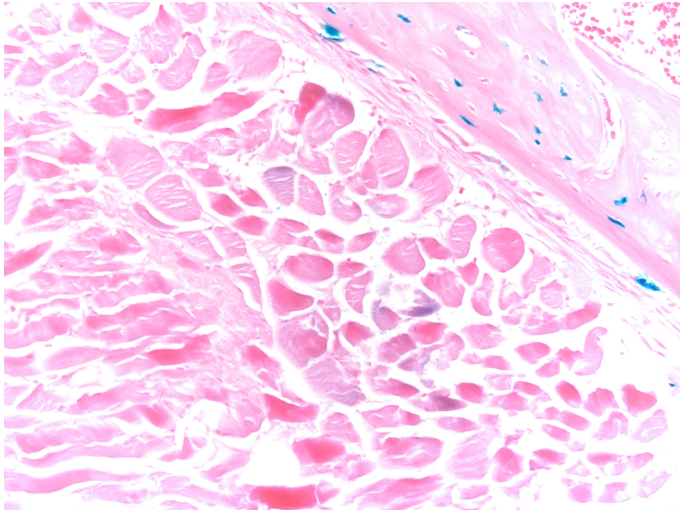

**D**

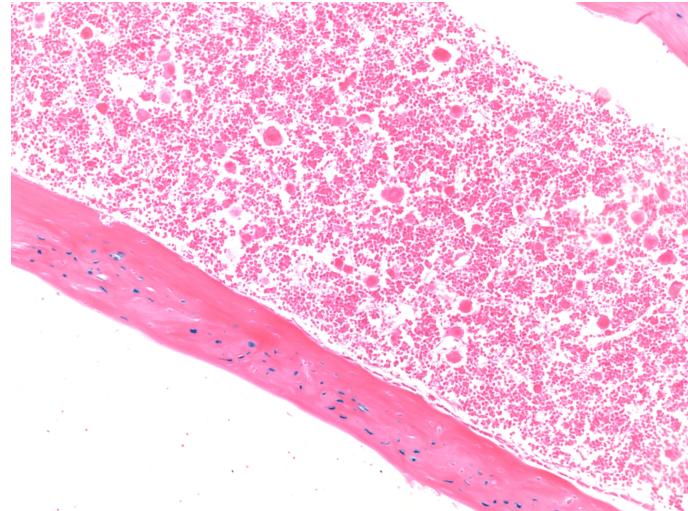

**Suppl. Figure 2**

Supplement: NIHMS357331-supplement-supplement_1.pdf [file NIHMS357331-supplement-supplement_1.pdf]
